# Supplementary material
Source: MDPI journal article supplement (https://www.mdpi.com/2311-5629/6/4/66)
Supplement: s1 [file s1]

## Electronic - Supplementary Materials

*C Journal of Carbon Research*

## Characterization of molecular spacer enhanced nanostructured carbons for electrical energy storage

Justin A. Zuczek,<sup>a</sup> Matthew Bonfield,<sup>a</sup> Nesreen Elathram,<sup>a</sup> William R. Hixson,<sup>a</sup> Terawit Kongruengkit<sup>a</sup>, James B. Mitchell,<sup>a</sup> Nickolas Zelenka,<sup>a</sup> Leonid D. Popov,<sup>b</sup> Andrey Morozov<sup>b</sup>, Igor N. Shcherbakov,<sup>b</sup> and J. C. Poler<sup>a†</sup>

<sup>a</sup> Department of Chemistry, University of North Carolina at Charlotte, Charlotte, NC

<sup>b</sup> Chair of Physical and Colloid Chemistry, Southern Federal University, Rostov-on-Don, Russian Federation.

<sup>a†</sup> Corresponding Author: Department of Chemistry, University of North Carolina at Charlotte, Charlotte, NC Fax: (704) 687-0960; Tel: (704) 687-8289; E-mail: [jcpoler@uncc.edu](mailto:jcpoler@uncc.edu)

## LIST OF ABBREVIATIONS

|                        |                                                                                                                                                     |
|------------------------|-----------------------------------------------------------------------------------------------------------------------------------------------------|
| +2Cu <sub>2</sub>      | 4-( <i>tert</i> -butyl)-2,6-bis((2-(phthalazin-1-yl)hydrazono)methyl) phenol(m <sub>2</sub> -methoxo) dicopper(II)-chloride                         |
| +2Cu <sub>2</sub> FcOH | biscopper [4- <i>tert</i> -butyl-2,6-diformylphenol bis-ferrocenoylhydrazone hydroxide]-(NO <sub>3</sub> ) <sub>2</sub>                             |
| +2Ru <sub>2</sub>      | [Cl(2,20;60,200-terpyridine)Ru(tetrapyrido-[3,2-a:20,30c:300,200h:200,300j]phenazine)Ru(2,20;60,200-terpyridine)Cl]-(PF <sub>6</sub> ) <sub>2</sub> |
| +2Zn <sub>2</sub>      | 4-( <i>tert</i> -butyl)-2,6-bis((2-(phthalazin-1-yl)hydrazono)methyl) phenol(m <sub>2</sub> -methoxo) dizinc(II)-acetate                            |
| +2Zn <sub>2</sub> Ac   | 4-( <i>tert</i> -butyl)-2,6-bis((2-(phthalazin-1-yl)hydrazono)methyl) phenol (m <sub>2</sub> -methoxo acetate) dizinc(II)-acetate                   |
| AcFc                   | acetylferrocene                                                                                                                                     |
| AFM                    | atomic force microscopy                                                                                                                             |
| Ag/AgNO <sub>3</sub>   | silver/silver nitrate                                                                                                                               |

|                                   |                                                                                           |
|-----------------------------------|-------------------------------------------------------------------------------------------|
| AIC                               | Akaike's information criterion                                                            |
| ATR FT-IR                         | attenuated total reflection Fourier-transform infrared spectroscopy                       |
| CCC                               | critical coagulation concentration                                                        |
| CE                                | counter electrode                                                                         |
| CHI <sub>3</sub>                  | iodoform                                                                                  |
| CNI                               | carbon nanotechnologies inc. SWCNTs                                                       |
| CNTs                              | carbon nanotubes                                                                          |
| Cu <sub>2</sub> FcCl <sub>3</sub> | biscopper [4- <i>tert</i> -butyl-2,6-diformylphenol bis-ferrocenoylhydrazone trichloride] |
| Cu <sub>2</sub> FcOH              | biscopper [4- <i>tert</i> -butyl-2,6-diformylphenol bis-ferrocenoylhydrazone hydroxide]   |
| Cu(NO <sub>3</sub> ) <sub>2</sub> | copper (ii) nitrate                                                                       |
| C <sub>s</sub>                    | specific capacitance                                                                      |
| CV                                | cyclic voltammetry                                                                        |
| DFT                               | density functional theory                                                                 |
| DLA                               | diffusion limited aggregation                                                             |
| DMF                               | N,N-dimethylformamide                                                                     |
| DMSO                              | dimethyl sulfoxide                                                                        |
| D <sub>s</sub>                    | dispersion stability                                                                      |
| EDL                               | electrical double layer                                                                   |
| EDLC                              | electrical double layer capacitor                                                         |
| EDX                               | energy dispersive x-ray spectroscopy                                                      |
| EELS                              | electron energy loss spectroscopy                                                         |
| EIS                               | electrochemical impedance spectroscopy                                                    |
| EtOH                              | ethanol                                                                                   |
| GCD                               | galvanostatic charge-discharge                                                            |
| HCl                               | hydrochloric acid                                                                         |
| HiPco                             | high pressure carbon monoxide                                                             |
| HOMO                              | highest occupied molecular orbital                                                        |
| IASS                              | ion-accessible surface site                                                               |

|                 |                                          |
|-----------------|------------------------------------------|
| ILCT            | ion-ligand charge transfer               |
| IPA             | isopropyl alcohol                        |
| ITO             | indium tin oxide                         |
| LUMO            | lowest unoccupied molecular orbital      |
| MeCN            | acetonitrile                             |
| MeOH            | methanol                                 |
| MLCT            | metal-ligand charge transfer             |
| MOF             | metal organic framework                  |
| MS              | mass spectrometry                        |
| MWCNTs          | multi-walled carbon nanotubes            |
| NaBr            | sodium bromide                           |
| NaOH            | sodium hydroxide                         |
| NI              | NanoIntegris SWCNTs                      |
| NMP             | N-methyl-2-pyrrolidone                   |
| PPr             | polypropylene                            |
| PTFE            | polytetrafluoroethylene                  |
| RBF             | round bottom flask                       |
| RE              | reference electrode                      |
| RLA             | reaction limited aggregation             |
| RMS             | root mean squared                        |
| SC              | supercapacitor                           |
| SHE             | standard hydrogen electrode              |
| SSA             | specific surface area                    |
| SWCNTs          | single-walled carbon nanotubes           |
| TBATFB          | tetrabutylammonium tetrafluoroborate     |
| <sup>t</sup> Bu | tert-butyl                               |
| TD-DFT          | time dependent density functional theory |
| TsOH            | p-toluene sulfonic acid                  |

UV-Vis-NIR ultraviolet-visible-near infrared

WE working electrode

## Molecular Spacers

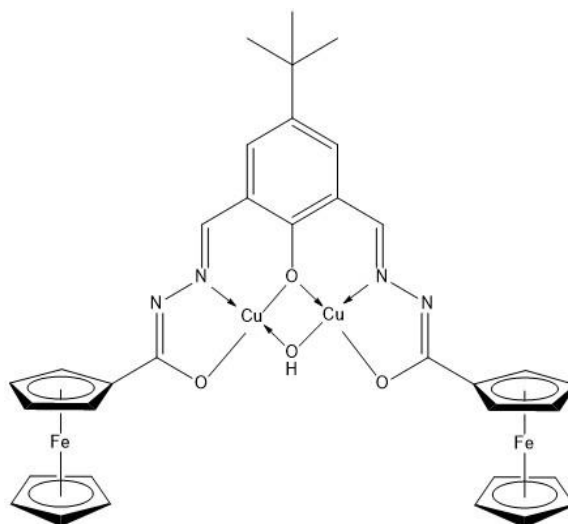

Figure S1: Confirmed structure of Cu<sub>2</sub>FcOH. Ferrocene ligands provide redox sites, aromaticity provides binding to SWCNTs, and <sup>t</sup>Bu provides steric bulk.

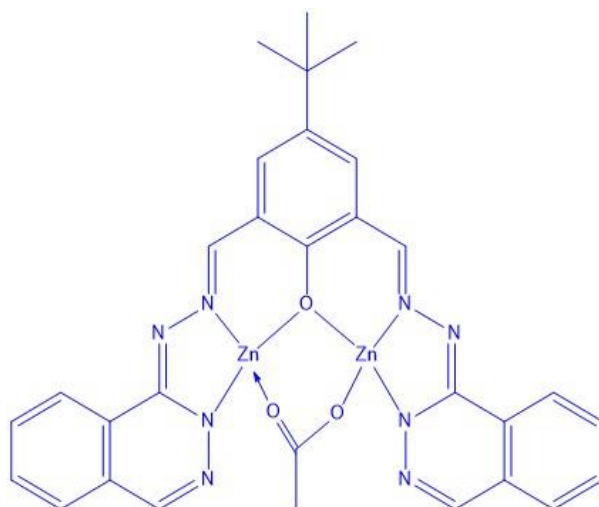

Figure S2: Structure of  $+2\text{Zn}2\text{Ac}$ . Added aromaticity should provide strong binding to SWCNTs, and the  $^t\text{Bu}$  provides steric bulk.

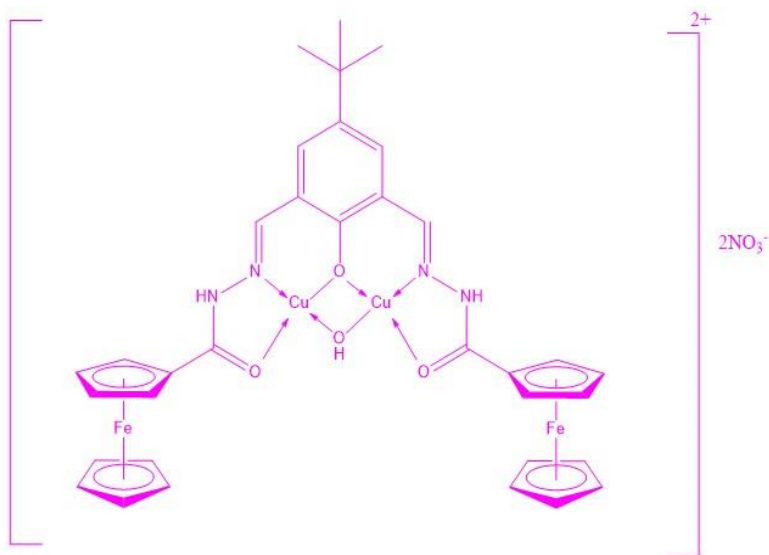

Figure S3: Structure of  $+2\text{Cu}_2\text{FcOH}$ . Ferrocene ligands provide redox sites, aromaticity provides binding to SWCNTs, and  $^t\text{Bu}$  provides steric bulk. The dication overall charge should provide stronger binding via electrostatic interactions compared to  $\text{Cu}_2\text{FcOH}$ .

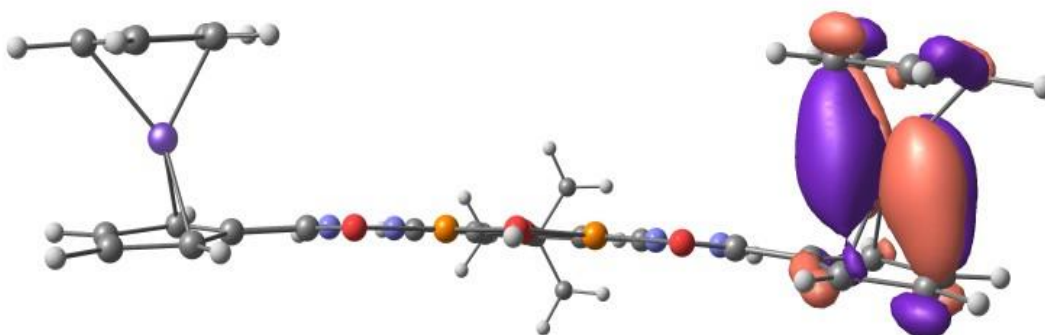

Figure S4: Calculated HOMO for  $+2\text{Cu}_2\text{FcOH}$  looking down the Z-axis.

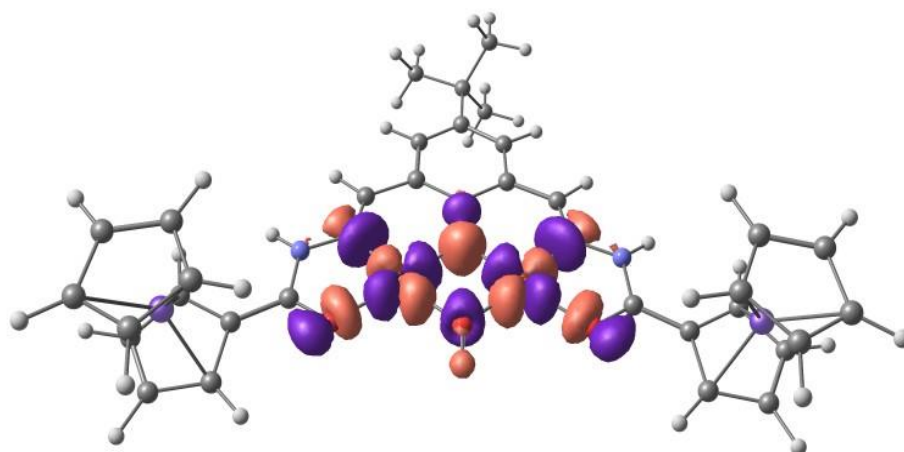Figure S5: Calculated LUMO for +2Cu<sub>2</sub>FcOH.

|               |                         | Energy (eV) |
|---------------|-------------------------|-------------|
| $\alpha$ HOMO | Ferrocene ligand        | -0.3764     |
| $\alpha$ HOMO | Second ferrocene ligand | -0.3759     |
| $\beta$ HOMO  | Ferrocene ligand        | -0.3763     |
| $\beta$ HOMO  | Second ferrocene ligand | -0.3758     |
| $\alpha$ LUMO | Copper and bridge       | -0.2871     |
| $\alpha$ LUMO | Copper and bridge       | -0.2801     |
| $\beta$ LUMO  | Copper and bridge       | -0.3282     |
| $\beta$ LUMO  | Copper and bridge       | -0.3055     |

Table S1: Calculated HOMO and LUMO energies for +2Cu<sub>2</sub>FcOH.  $\Delta V$  of 0.09 V measured between HOMO and LUMO ( $\alpha$ ). For the ligand, measured energy difference was 3.8 V, a 97.6% decrease. Optical transitions from absorption spectroscopy between the HOMO and LUMO would be unmeasurable.

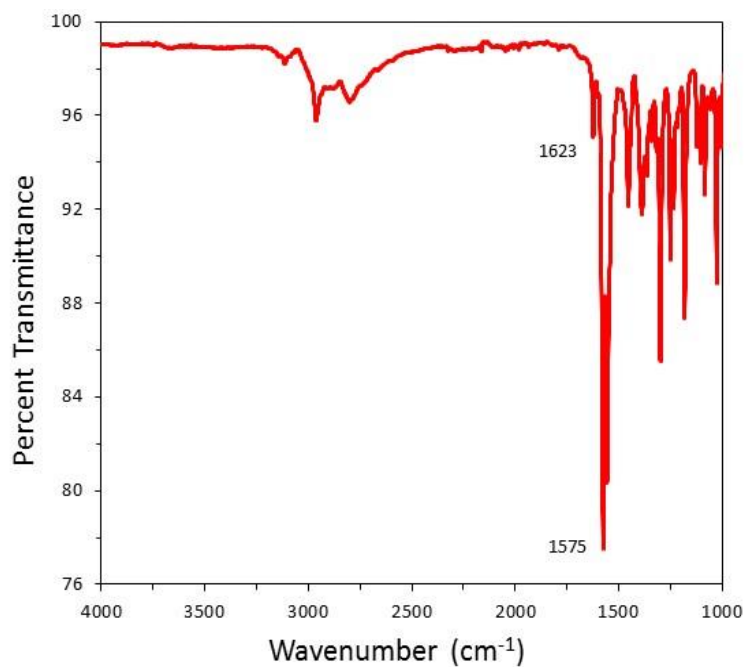

Figure S6: IR spectra of Cu<sub>2</sub>FcCl<sub>3</sub>. -C=O (1623 cm<sup>-1</sup>), -C=N (1575 cm<sup>-1</sup>). Ferrocene vibrates around 480 cm<sup>-1</sup>.

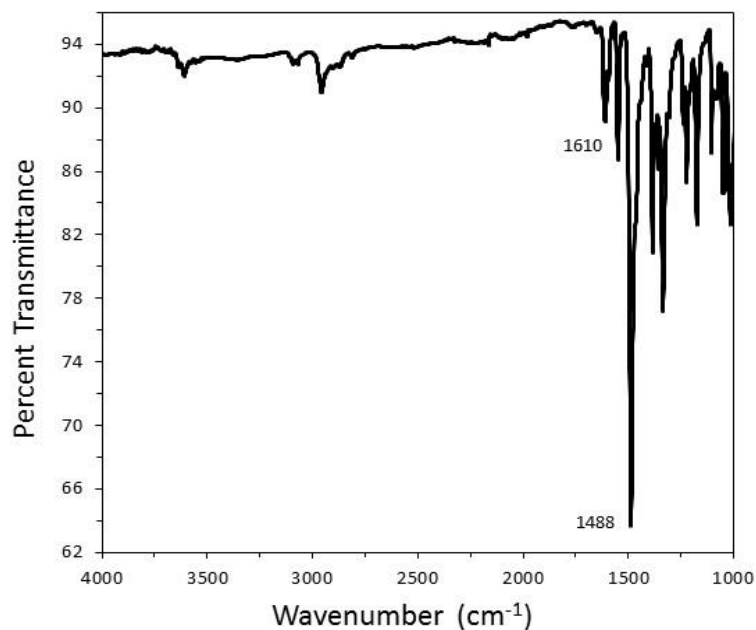

Figure S7: IR spectra of Cu<sub>2</sub>FcOH. -C=N (1610 cm<sup>-1</sup>), -C=C (1488 cm<sup>-1</sup>). Ferrocene vibrates around 480 cm<sup>-1</sup>.



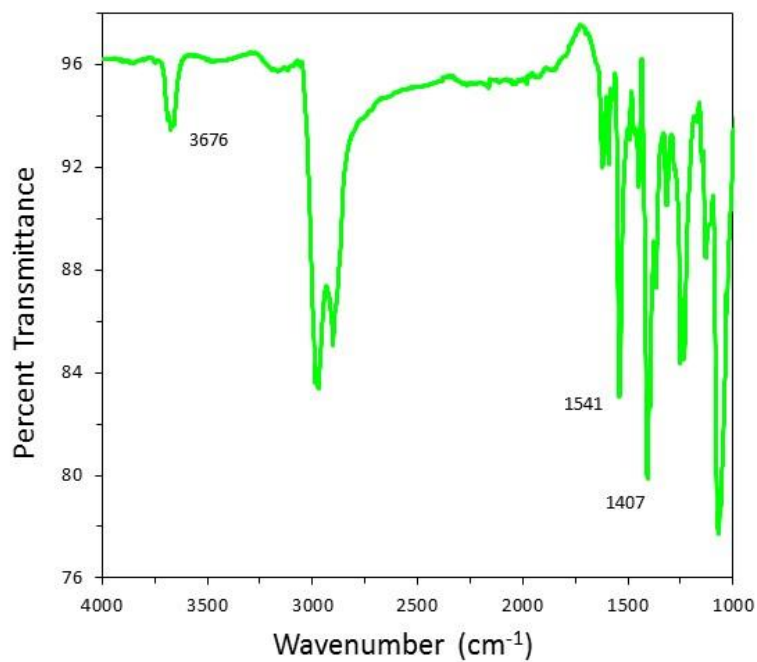

Figure S8: IR spectra of +2Cu<sub>2</sub>. Unidentified (3676 cm<sup>-1</sup>), -C=N (1541 cm<sup>-1</sup>), -C=C (1407 cm<sup>-1</sup>).

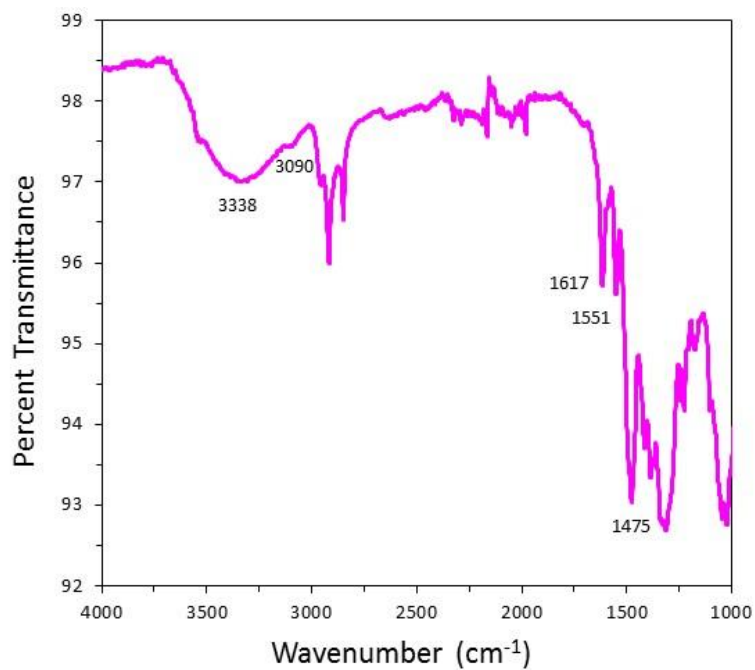

Figure S9: IR spectra of +2Cu<sub>2</sub>FcOH. -O-H (3338 cm<sup>-1</sup>), -N-H (3090 cm<sup>-1</sup>), -C=O (1617 cm<sup>-1</sup>), -C=N (1551 cm<sup>-1</sup>), -C=C (1475 cm<sup>-1</sup>). Ferrocene vibrates around 480 cm<sup>-1</sup>.

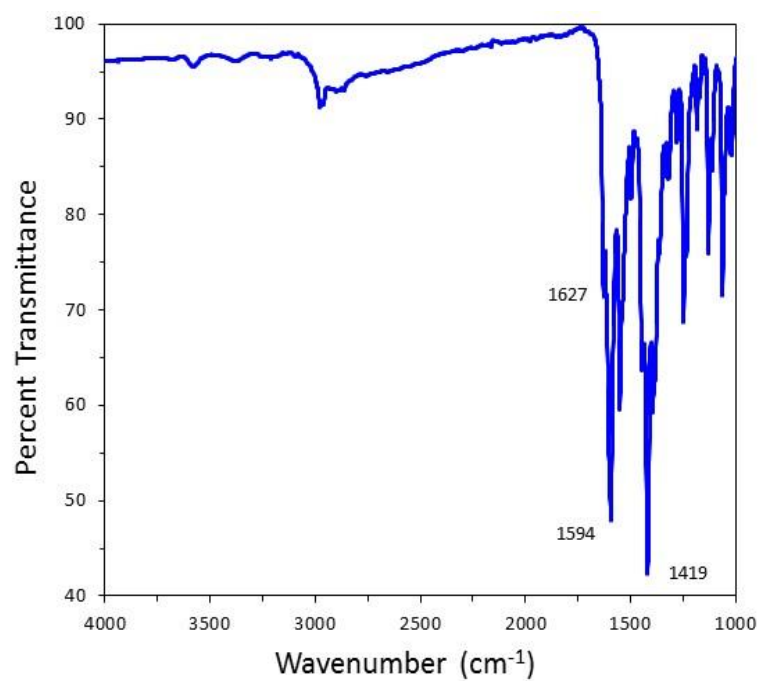

Figure S10: IR spectra of +2Zn2Ac. -C=O (1627 cm<sup>-1</sup>), -C=N (1594 cm<sup>-1</sup>), -C=C (1419 cm<sup>-1</sup>).

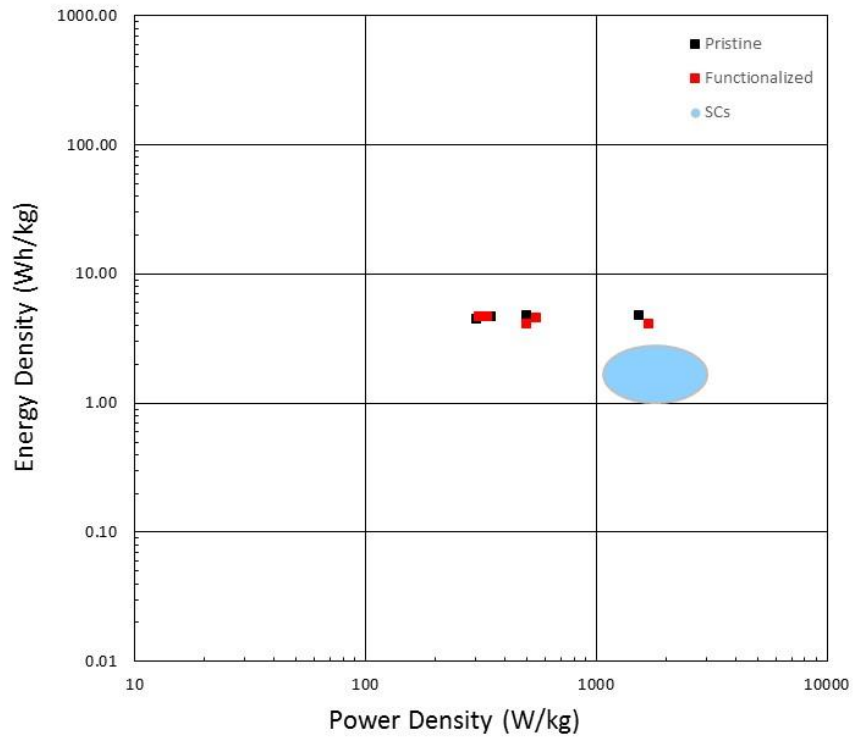

Figure S11: Ragone plot plotting energy density as a function of power density. Pristine and functionalized films are compared to commercially available supercapacitors. Energy density is not lost as power density is increased.

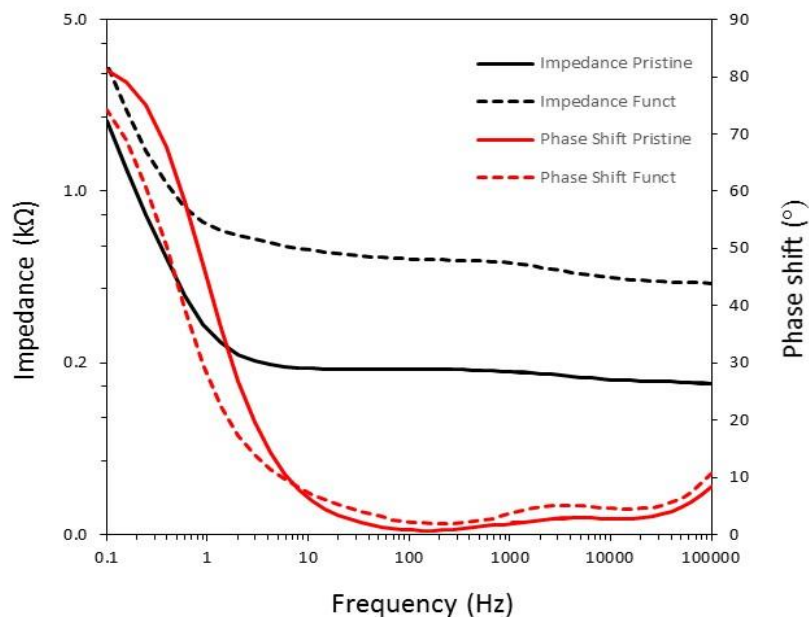

Figure S12A: EIS of pristine and functionalized SWCNTs with 20.2 and 20.4  $\mu\text{g}$  of CNTs, respectively. The operating potential was 1 V with a current amplitude of 5 mV. Impedance through the functionalized film ( $420 \Omega$ ) was larger than pristine ( $250 \Omega$ ).

For EIS, the average measured impedance of pristine SWCNTs was calculated as  $260 \pm 50 \Omega$  at 1 V. As the frequency increased, the impedance of the system decreased. The functionalized film shows much larger impedance than the pristine film ( $660$  vs.  $190 \Omega$  at 100 Hz). Working hypotheses are that molecular spacers (even at low concentration) are prohibiting current transport, or the uneven surface morphology of the film creates greater impedance. On average, measured at 1 V, the impedance for pristine CNTs was  $250 \pm 50 \Omega$ . For functionalized,  $420 \pm 30 \Omega$  was measured. Using a 95% confidence interval, the films are statistically different. The higher impedance through functionalized films compared to pristine films could also suggest molecular spacer intercalation between CNTs. If CNTs are more spread out, current wouldn't flow as easily resulting in an increase in resistance/impedance.

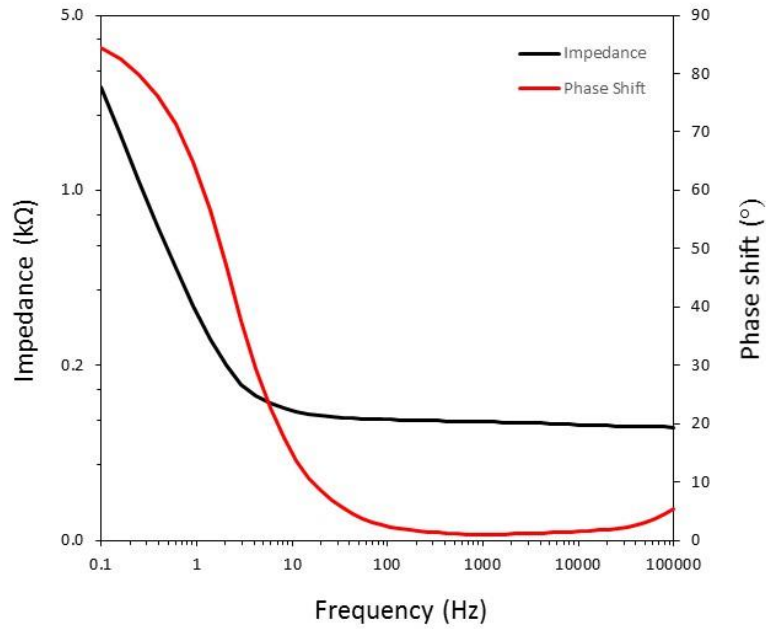

Figure S12B: EIS of pristine SWCNTs at 0 V with an amplitude of 5 mV. Average impedance for three films was calculated to be  $260 \pm 50 \Omega$ . Reactance of the capacitive like behavior of SWCNTs shows a larger impedance at lower frequency.

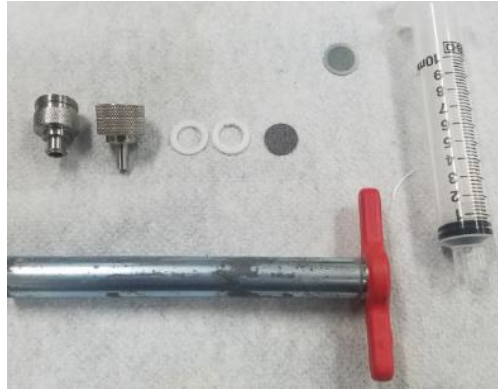

Figure S13 – components to 13 mm syringe filter

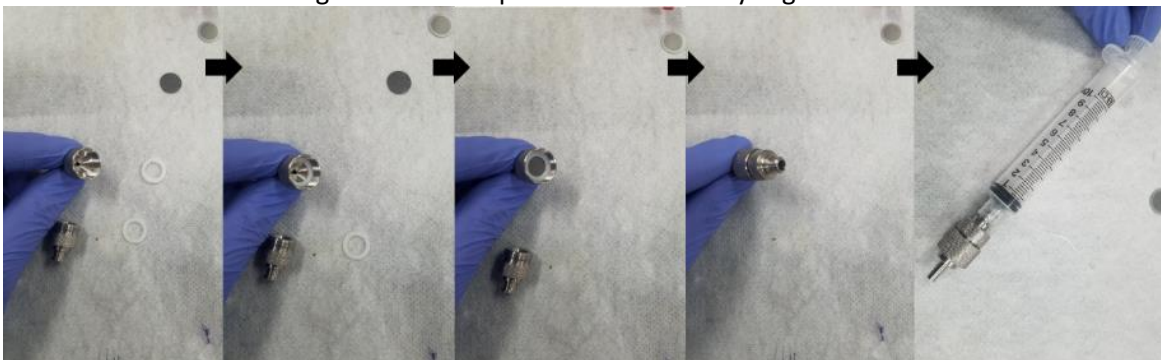

Figure S14 – 13 mm syringe assembly

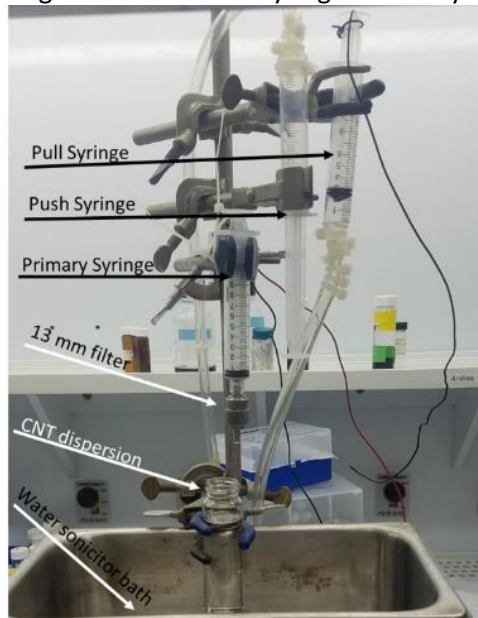

Figure S15 – Parts on auto cycle filter

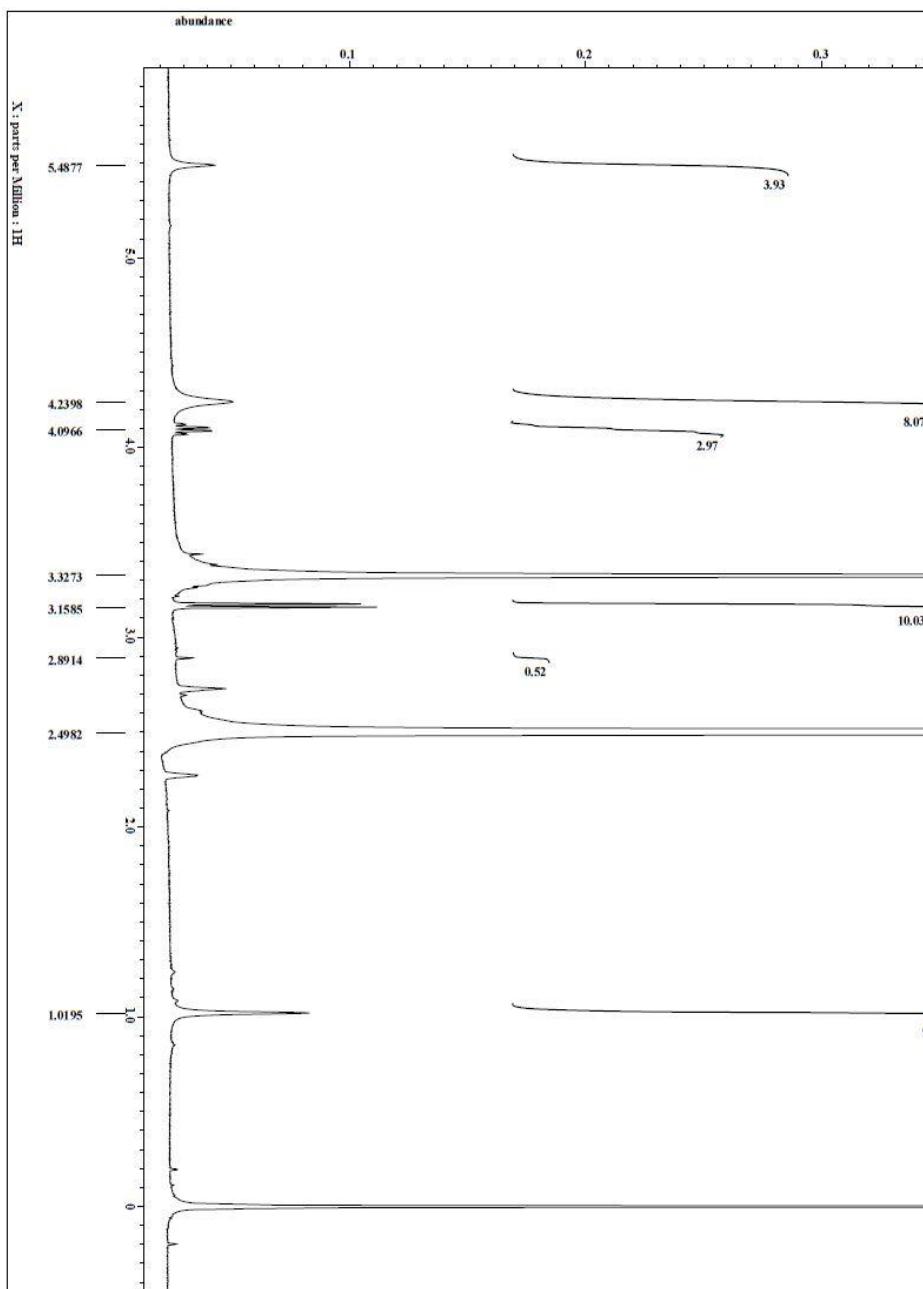

Figure S16: Proton NMR of Cu<sub>2</sub>FcOH. Shifts at 3.15 and 4.09 ppm are impurities in the sample. The –OH bridging ligand does not show a proton. The electron withdrawing effects of the metal centers could affect the shift significantly.

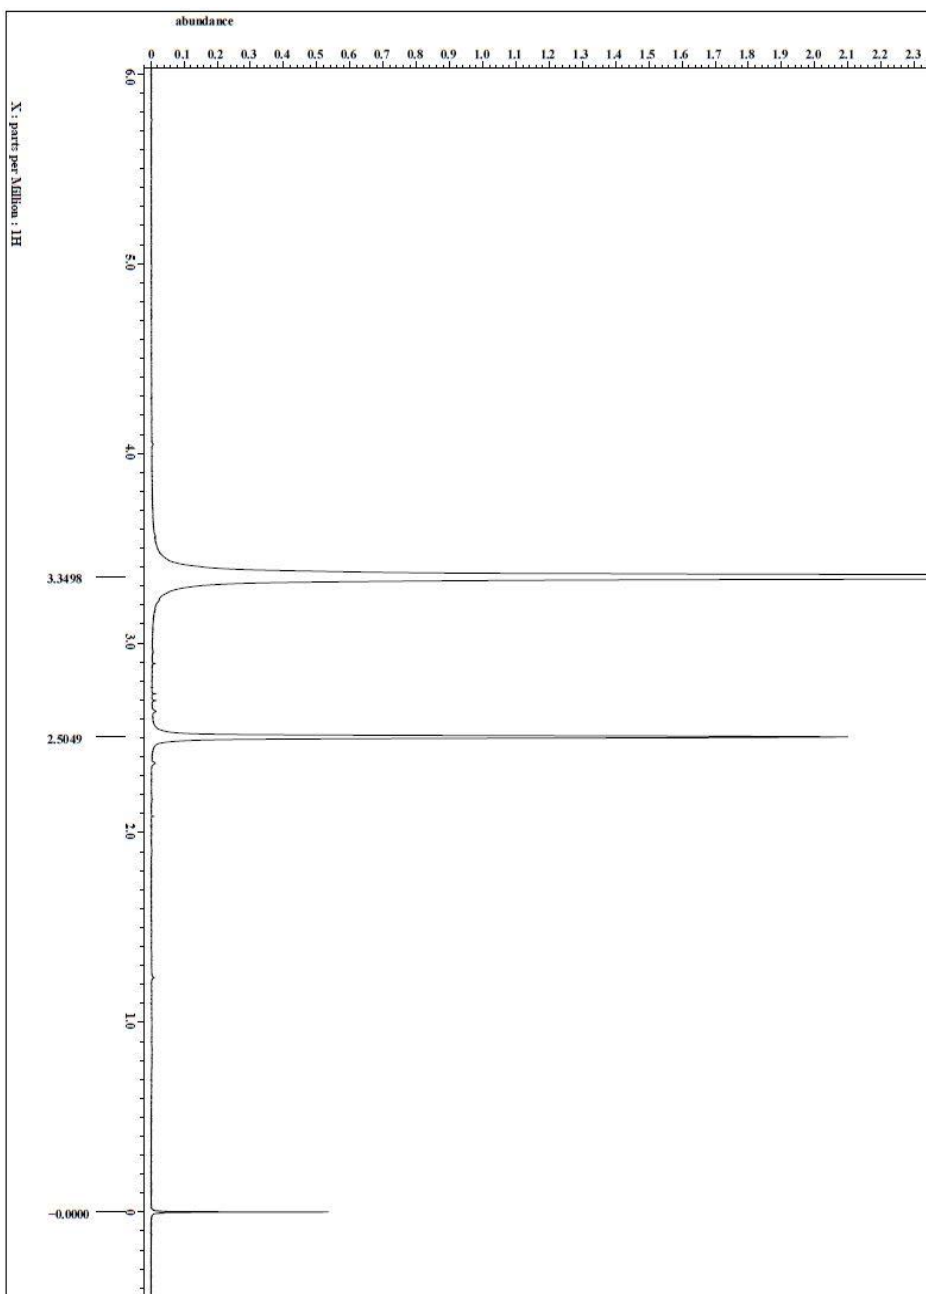

Figure S17: Proton NMR of  $\text{Cu}_2\text{FcCl}_3$ . The paramagnetic property of copper with the electron withdrawing chloro bridge can provide extreme deshielding of protons. However, no peaks are observed measured up to 200 ppm.



Figure S18: Proton NMR of +2Zn2Ac.

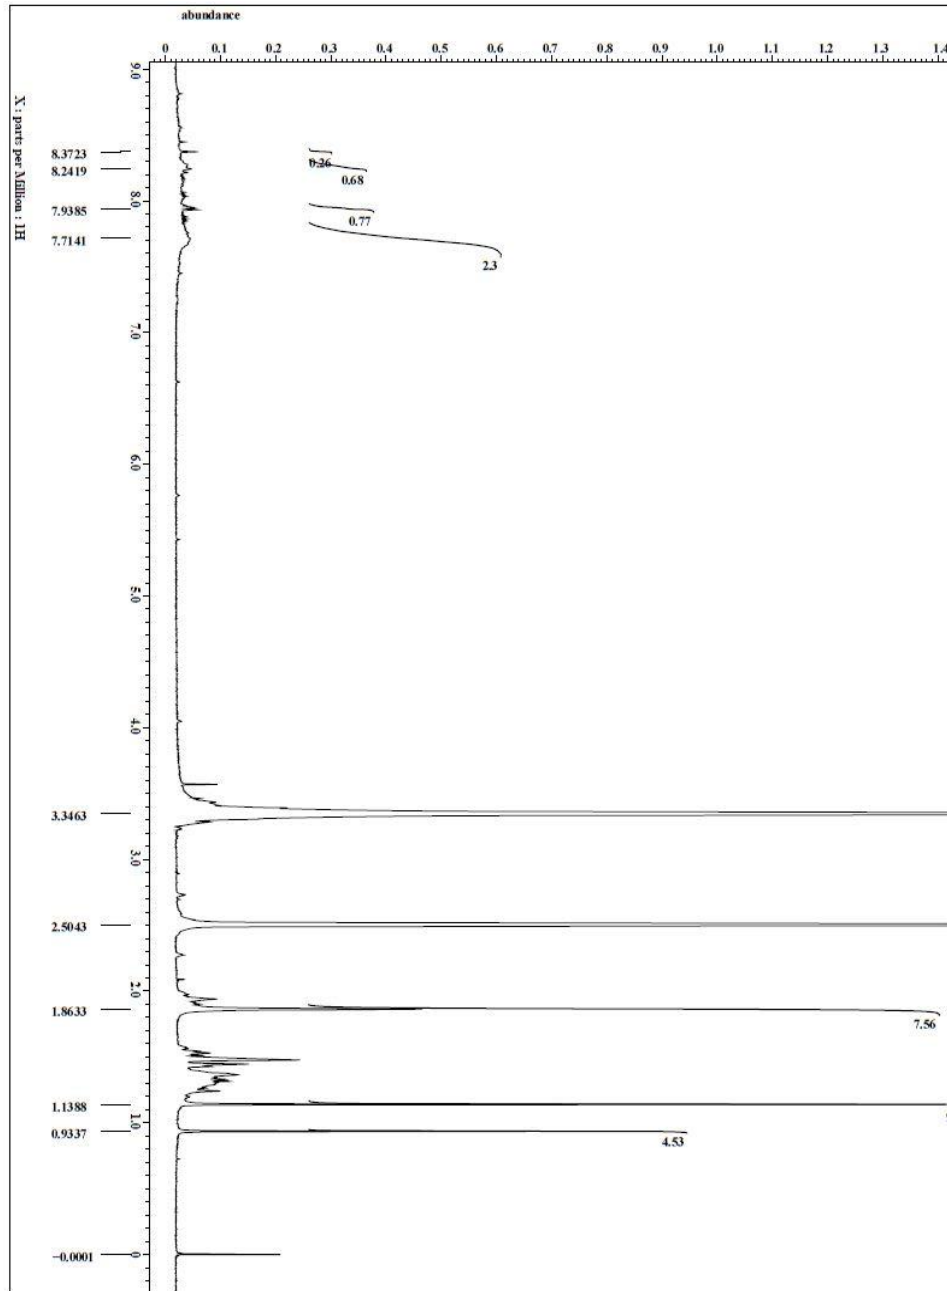

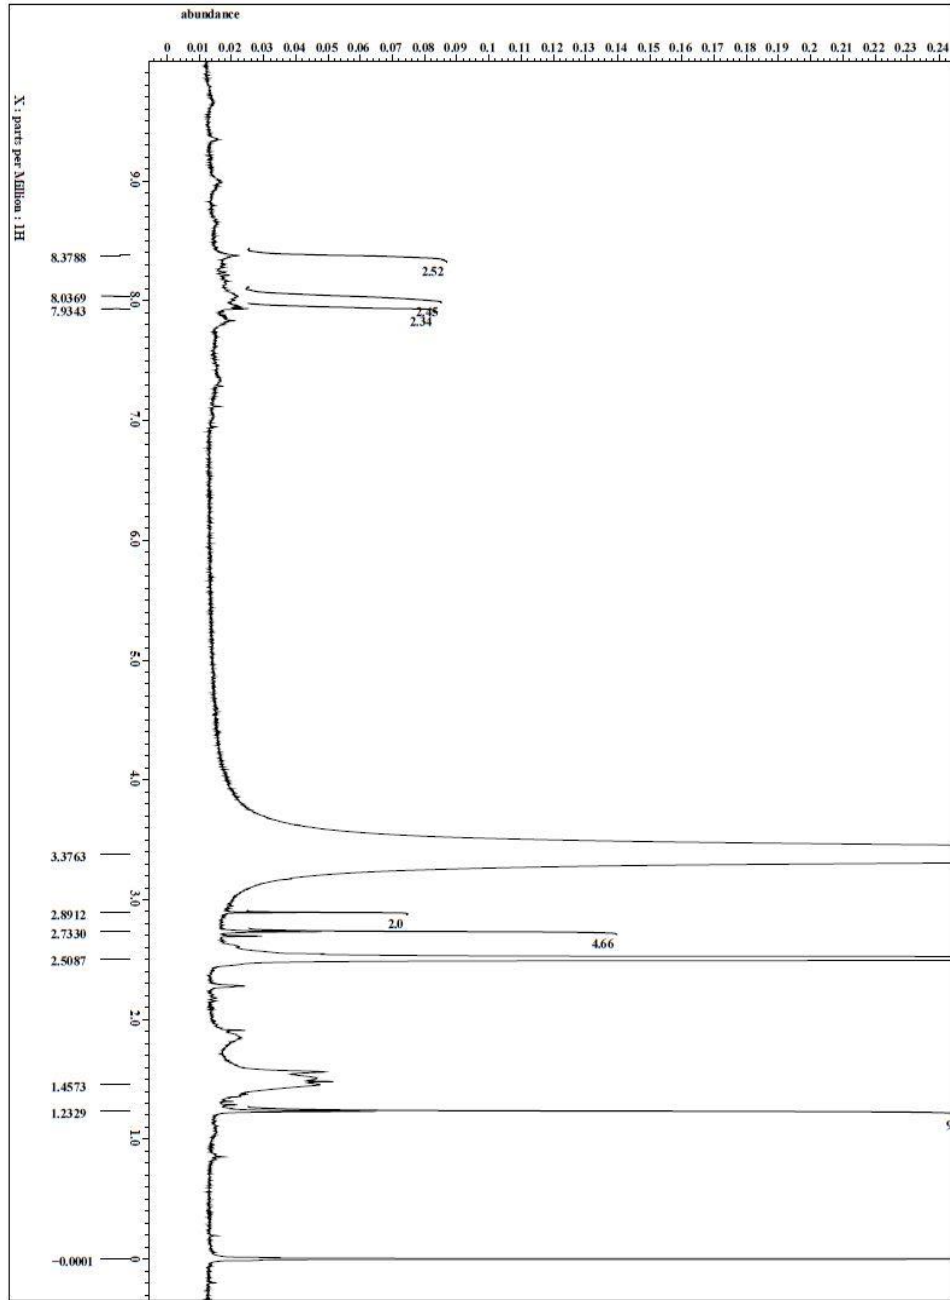

Figure S18: Proton NMR of +2Cu2

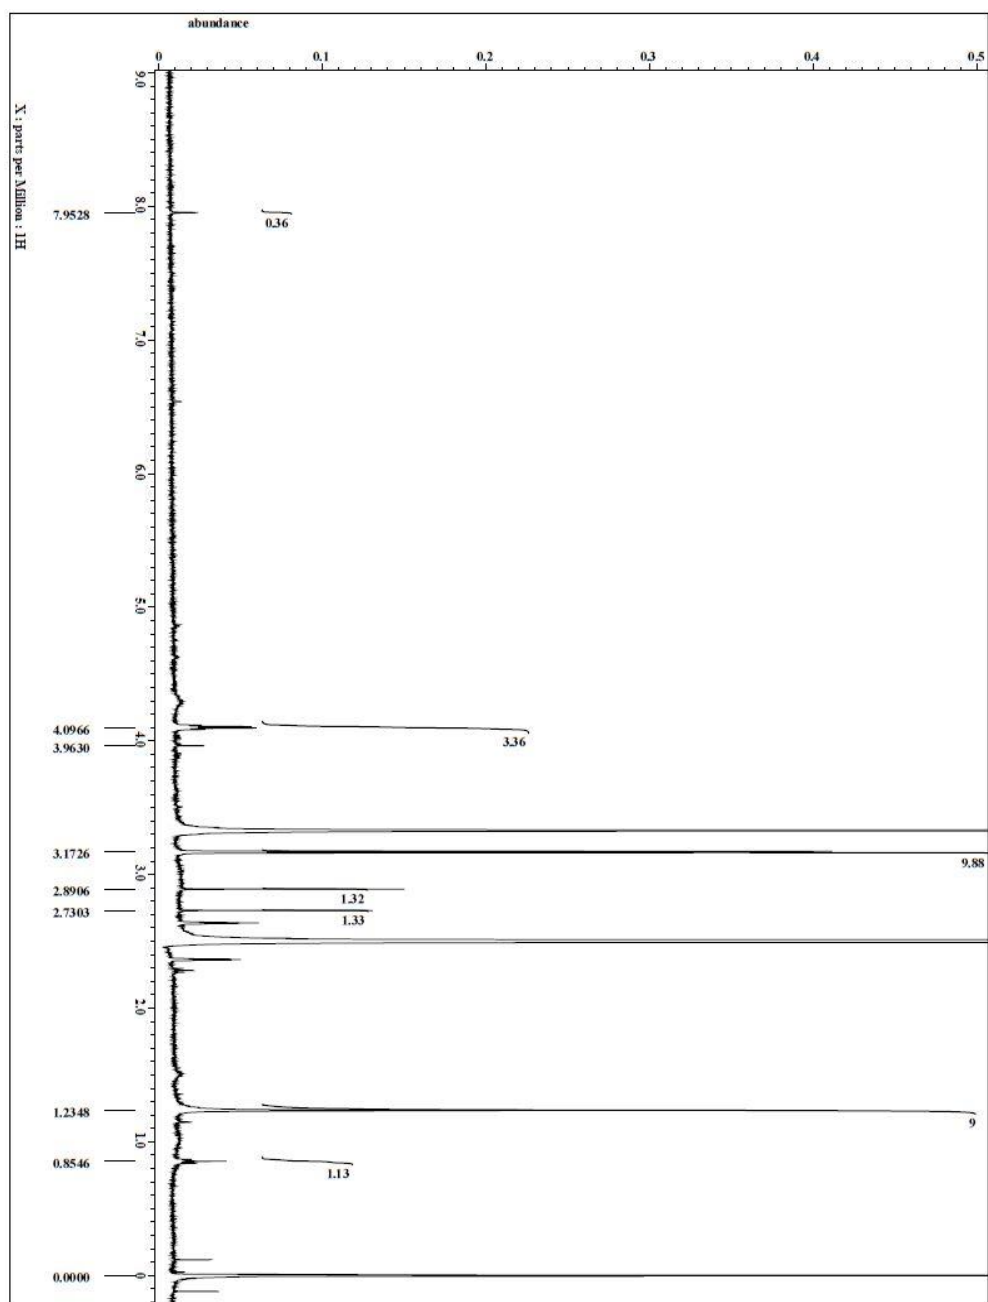

Figure S19: Proton NMR of  $+2\text{Cu}_2\text{FeOH}$ . This shows a similar spectra to  $\text{Cu}_2\text{FeOH}$ , which is expected due to the same structure minus a protonated nitrogen.

Electrical Characterization Equations:

$$C = \frac{\epsilon_0 \epsilon_r A}{d}$$

where C is capacitance in Farads,  $\epsilon_0$  is the dielectric constant of free space in vacuum,  $\epsilon_r$  is the dielectric constant of the solvent in  $F m^{-1}$ , A is the surface area of the material in  $m^2$ , and d is the distance between electrical double layer and ion interface in m.

$$C = \frac{Q}{V}$$

where the capacitance in Farads is equal to the charge stored, Q divided by the potential at which the parallel-plate capacitor is maintained, V

Using GCD data we analyze C using the time derivative of  $Q = CV$  such that:

$$C = \frac{dQ/dt}{dV/dt}$$

Since  $dQ/dt = I$  the constant current and  $dV/dt$  is measured from the experimental slope of the discharge curve.  $C_s = C/m$  where m is the mass of the active material in the working electrode.

Specific energy is calculated from the know equation  $E_s = \frac{C_s (\Delta V)^2}{2}$  where  $\Delta V$  is measured over the linear portion of discharge curve.

Specific power is calculated from the specific energy and the  $\Delta t$  measured during the discharge:

$$P_s = \frac{E_s}{\Delta t}$$

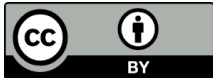

© 2020 by the authors. Licensee MDPI, Basel, Switzerland. This article is an open access article distributed under the terms and conditions of the Creative Commons Attribution (CC BY) license (<http://creativecommons.org/licenses/by/4.0/>).
